# Supplementary material
Source: PubMed Central journal article supplement (PMC1544226)
Supplement: pnas_0604768103_9.pdf [file pnas_0604768103_9.pdf]

171

303

**DrSINE3**

CGCCGTCTTTCGGATGAGACGTTAAACCGAGGTCCTGACTCTCTGTGGTCATTAAAAATCCCATGGCACTTCTCGTAAAGAGTAGGGGG

**Eel**

|||||  
GCACTGTCTTTGGATGAGACATTAAACCGGTCCTGACTCACTCTGGTCATTAAAGATCCAAGGGCACTTATCACATAGAGTAGGGGG
