# Supplementary material
Source: PubMed Central journal article supplement (PMC1544226)
Supplement: pnas_0604768103_12.pdf [file pnas_0604768103_12.pdf]

**DrSINE3** GGTCATTAAAAATCCCATGGCACTTCTCGTAAAGAGTAGGGGTGT-AACCCCGGTGCCTGGCCAAATTCC  
||||| ||||||| ||||||| ||||||| ||||| ||||| ||||||| ||||||| ||||||| |||||||

**Blood fluke** GGTCATTAAAGATCCCATGGCACTAATCGTAA-GAGTAGCTGTGTTAACCCCGGTGCCTGGCTAAATTCC
