# Supplementary material
Source: PubMed Central journal article supplement (PMC1544226)
Supplement: pnas_0604768103_17.pdf [file pnas_0604768103_17.pdf]

**Table 3. Members of GalSINE3 family**

| Rank | Location                 | Strand | SW score | Size | Consensus start | Consensus end |
|------|--------------------------|--------|----------|------|-----------------|---------------|
| 1    | chr1:153559732-153559984 | -      | 865      | 253  | 79              | 335           |
| 2    | chr2:86373971-86374233   | +      | 690      | 263  | 45              | 324           |
| 3    | chr1:31190942-31191162   | +      | 690      | 221  | 63              | 287           |
| 4    | chr3:93742939-93743205   | -      | 665      | 267  | 49              | 292           |
| 5    | chr5:2131646-2131818     | +      | 590      | 173  | 164             | 335           |
| 6    | chr2:105966079-105966290 | +      | 585      | 212  | 124             | 339           |
| 7    | chr4:76706344-76706629   | +      | 540      | 286  | 49              | 340           |
| 8    | chr6:32001439-32001601   | +      | 535      | 163  | 175             | 339           |
| 9    | chr1:6733353-6733578     | +      | 520      | 226  | 96              | 333           |
| 10   | chr7:201096-201239       | -      | 515      | 144  | 163             | 316           |
| 11   | chr18:8369607-8369789    | -      | 510      | 183  | 152             | 336           |
| 12   | chr5:5295148-5295307     | -      | 510      | 160  | 157             | 317           |
| 13   | chr1:22301395-22301537   | +      | 485      | 143  | 188             | 334           |
| 14   | chr8:5961461-5961615     | -      | 485      | 155  | 176             | 338           |
| 15   | chr8:26461842-26462022   | +      | 485      | 181  | 157             | 339           |
| 16   | chr1:52160307-52160450   | +      | 485      | 144  | 189             | 340           |
| 17   | chr12:13944535-13944673  | +      | 480      | 139  | 199             | 340           |
| 18   | chr10:17196788-17196951  | +      | 445      | 164  | 178             | 336           |
| 19   | chr8:15929881-15930053   | -      | 445      | 173  | 165             | 329           |
| 20   | chr1:60226821-60226981   | -      | 445      | 161  | 121             | 282           |
| 21   | chr3:94095561-94095685   | +      | 440      | 125  | 178             | 307           |
| 22   | chr2:137306599-137306762 | +      | 440      | 164  | 187             | 336           |
| 23   | chr2:143078532-143078658 | +      | 435      | 127  | 58              | 181           |
| 24   | chr7:9125257-9125400     | -      | 425      | 144  | 196             | 340           |
| 25   | chr2:27281973-27282118   | +      | 425      | 146  | 192             | 340           |
| 26   | chr4:3525659-3525798     | -      | 425      | 140  | 157             | 289           |
| 27   | chr8:27424125-27424316   | -      | 415      | 192  | 26              | 225           |

|    |                              |   |     |     |     |     |
|----|------------------------------|---|-----|-----|-----|-----|
| 28 | chr13:4234329-4234466        | + | 415 | 138 | 166 | 312 |
| 29 | chr7:34133449-34133592       | + | 410 | 144 | 190 | 336 |
| 30 | chr10:11756508-11756655      | - | 410 | 148 | 165 | 316 |
| 31 | chr1:159324355-<br>159324468 | - | 400 | 114 | 219 | 334 |
| 32 | chr1:4657910-4658070         | - | 395 | 161 | 163 | 334 |
| 33 | chr6:16328480-16328629       | + | 390 | 150 | 164 | 317 |
| 34 | chr24:914297-914437          | - | 390 | 141 | 160 | 336 |
| 35 | chr8:26196037-26196154       | - | 390 | 118 | 215 | 336 |
| 36 | chr14:4117768-4117958        | - | 390 | 191 | 147 | 340 |
| 37 | chr2:134114760-<br>134114895 | - | 390 | 136 | 146 | 283 |
| 38 | chr4:28178254-28178337       | - | 380 | 84  | 250 | 333 |
| 39 | chr2:31975018-31975167       | - | 375 | 150 | 49  | 198 |
| 40 | chr1:95263331-95263473       | - | 375 | 143 | 189 | 336 |
| 41 | chr4:29803565-29803657       | + | 370 | 93  | 250 | 339 |
| 42 | chr1:85674063-85674143       | + | 370 | 81  | 254 | 335 |
| 43 | chr2:121630782-<br>121630927 | + | 370 | 146 | 164 | 309 |
| 44 | chr1:19246393-19246465       | - | 370 | 73  | 242 | 315 |
| 45 | chr5:47979999-47980133       | - | 365 | 135 | 164 | 301 |
| 46 | chr3:101318301-<br>101318391 | - | 365 | 91  | 191 | 283 |
| 47 | chr1:76946793-76946888       | + | 360 | 96  | 245 | 340 |
| 48 | chr5:44208740-44208818       | + | 360 | 79  | 240 | 317 |
| 49 | chr2:38557138-38557201       | - | 360 | 64  | 232 | 295 |
| 50 | chr7:21017942-21018084       | + | 360 | 143 | 165 | 308 |
| 51 | chr6:29821890-29822033       | + | 360 | 144 | 193 | 340 |
| 52 | chr1:136702479-<br>136702637 | - | 355 | 159 | 188 | 340 |
| 53 | chr6:7848755-7848852         | - | 355 | 98  | 241 | 340 |
| 54 | chr3:8687997-8688229         | + | 355 | 233 | 52  | 289 |
| 55 | chr1:1600254-1600352         | - | 355 | 99  | 159 | 262 |
| 56 | chr11:8766805-8766975        | - | 355 | 171 | 168 | 340 |
| 57 | chr6:13424529-13424670       | - | 355 | 142 | 189 | 340 |
| 58 | chr4:2015931-2016022         | + | 350 | 92  | 247 | 338 |

|    |                              |   |     |     |     |     |
|----|------------------------------|---|-----|-----|-----|-----|
| 59 | chr3:24617281-24617362       | + | 350 | 82  | 258 | 339 |
| 60 | chr5:22251165-22251367       | - | 350 | 203 | 56  | 259 |
| 61 | chr7:4374392-4374487         | - | 350 | 96  | 193 | 300 |
| 62 | chr6:2583480-2583571         | + | 345 | 92  | 244 | 332 |
| 63 | chr2:144872621-<br>144872761 | - | 345 | 141 | 44  | 182 |
| 64 | chrZ:14827775-14827982       | + | 345 | 208 | 124 | 334 |
| 65 | chr7:1770154-1770346         | - | 345 | 193 | 61  | 279 |
| 66 | chr3:98916330-98916428       | - | 345 | 99  | 241 | 336 |
| 67 | chr5:36881238-36881334       | + | 345 | 97  | 190 | 289 |
| 68 | chr1:149690835-<br>149690988 | - | 340 | 154 | 53  | 213 |
| 69 | chr2:92195207-92195310       | - | 340 | 104 | 233 | 336 |
| 70 | chr1:89387971-89388118       | - | 340 | 148 | 191 | 336 |
| 71 | chr4:78899238-78899308       | + | 340 | 71  | 271 | 340 |
| 72 | chr5:36338278-36338339       | - | 340 | 62  | 230 | 291 |
| 73 | chr13:2772636-2772718        | + | 340 | 83  | 196 | 281 |
| 74 | chr8:7632619-7632706         | - | 340 | 88  | 241 | 328 |
| 75 | chr1:16023311-16023481       | + | 335 | 171 | 154 | 328 |
| 76 | chr2:133998031-<br>133998128 | - | 335 | 98  | 243 | 336 |
| 77 | chr2:101866695-<br>101866798 | + | 335 | 104 | 191 | 297 |
| 78 | chr2:20470135-20470393       | + | 335 | 259 | 60  | 335 |
| 79 | chr11:9206490-9206580        | + | 335 | 91  | 226 | 317 |
| 80 | chr1:4425863-4426078         | - | 335 | 216 | 122 | 327 |
| 81 | chr10:5476386-5476576        | - | 330 | 191 | 132 | 336 |
| 82 | chr4:75192457-75192593       | + | 330 | 137 | 188 | 318 |
| 83 | chr4:2018471-2018521         | - | 330 | 51  | 244 | 294 |
| 84 | chr12:4280840-4280916        | - | 330 | 77  | 211 | 285 |
| 85 | chr2:32615775-32615863       | - | 330 | 89  | 163 | 251 |
| 86 | chr6:14434432-14434518       | - | 330 | 87  | 250 | 336 |
| 87 | chr4:10121166-10121273       | + | 330 | 108 | 235 | 339 |
| 88 | chr2:133871671-<br>133871803 | - | 330 | 133 | 190 | 329 |
| 89 | chr5:48441144-48441214       | - | 330 | 71  | 249 | 317 |

|     |                              |   |     |     |     |     |
|-----|------------------------------|---|-----|-----|-----|-----|
| 90  | chr1:46020672-46020808       | + | 330 | 137 | 155 | 299 |
| 91  | chr3:11393427-11393502       | - | 330 | 76  | 254 | 329 |
| 92  | chr2:102683750-<br>102683881 | + | 325 | 132 | 164 | 299 |
| 93  | chr2:118843720-<br>118843848 | - | 325 | 129 | 189 | 317 |
| 94  | chr10:7416659-7416768        | - | 325 | 110 | 229 | 335 |
| 95  | chr13:14952239-14952381      | - | 325 | 143 | 164 | 315 |
| 96  | chr4:88092028-88092301       | + | 325 | 274 | 57  | 340 |
| 97  | chr1:88928344-88928441       | - | 325 | 98  | 193 | 295 |
| 98  | chr3:92811538-92811677       | + | 320 | 140 | 190 | 334 |
| 99  | chr3:16640313-16640395       | - | 320 | 83  | 247 | 329 |
| 100 | chr3:83024573-83024726       | - | 320 | 154 | 175 | 335 |
| 101 | chr20:13249184-13249425      | - | 320 | 242 | 77  | 329 |
| 102 | chr9:17420839-17420926       | - | 320 | 88  | 244 | 331 |
| 103 | chr3:26285834-26285885       | + | 320 | 52  | 240 | 291 |
| 104 | chr5:44206134-44206284       | + | 320 | 151 | 58  | 208 |
| 105 | chr3:72335024-72335152       | + | 320 | 129 | 206 | 339 |
| 106 | chr1:92362603-92362850       | - | 315 | 248 | 74  | 330 |
| 107 | chr4:81626531-81626791       | - | 315 | 261 | 78  | 338 |
| 108 | chr3:51706056-51706151       | + | 315 | 96  | 245 | 340 |
| 109 | chr7:21147067-21147202       | - | 315 | 136 | 193 | 335 |
| 110 | chr1:45177177-45177252       | - | 315 | 76  | 242 | 315 |
| 111 | chr6:21038748-21038942       | - | 315 | 195 | 112 | 327 |
| 112 | chr2:41584079-41584185       | - | 315 | 107 | 43  | 152 |
| 113 | chr5:36881507-36881606       | - | 315 | 100 | 233 | 331 |
| 114 | chr3:22258952-22259041       | - | 315 | 90  | 201 | 293 |
| 115 | chr4:90235278-90235378       | - | 315 | 101 | 238 | 340 |
| 116 | chr1:1925357-1925529         | + | 310 | 173 | 164 | 336 |
| 117 | chr5:43608829-43608989       | + | 310 | 161 | 178 | 340 |
| 118 | chr20:10771432-10771527      | + | 310 | 96  | 193 | 306 |
| 119 | chrZ:4957086-4957190         | + | 310 | 105 | 67  | 184 |
| 120 | chr2:139815067-<br>139815145 | + | 310 | 79  | 233 | 312 |
| 121 | chr8:18063075-18063183       | - | 310 | 109 | 229 | 340 |

|     |                              |   |     |     |     |     |
|-----|------------------------------|---|-----|-----|-----|-----|
| 122 | chr7:11712377-11712513       | - | 310 | 137 | 163 | 303 |
| 123 | chr1:40679340-40679605       | - | 310 | 266 | 57  | 333 |
| 124 | chr2:7825023-7825085         | - | 310 | 63  | 244 | 307 |
| 125 | chr4:80379449-80379615       | + | 310 | 167 | 154 | 328 |
| 126 | chr3:58144268-58144322       | - | 310 | 55  | 247 | 301 |
| 127 | chr2:107209203-<br>107209291 | - | 310 | 89  | 134 | 220 |
| 128 | chr1:97699349-97699552       | + | 305 | 204 | 134 | 340 |
| 129 | chr10:16247557-16247828      | + | 305 | 272 | 56  | 340 |
| 130 | chr22:543872-544008          | + | 305 | 137 | 201 | 338 |
| 131 | chr5:21584859-21584953       | + | 305 | 95  | 202 | 299 |
| 132 | chr10:16251826-16252097      | + | 305 | 272 | 56  | 340 |
| 133 | chr4:74164028-74164111       | - | 300 | 84  | 231 | 315 |
| 134 | chr1:67136491-67136575       | - | 300 | 85  | 247 | 332 |
| 135 | chr1:161718675-<br>161718778 | - | 300 | 104 | 202 | 308 |
| 136 | chr7:34704354-34704436       | + | 300 | 83  | 247 | 334 |
| 137 | chr7:34409949-34410022       | - | 300 | 74  | 242 | 315 |
| 138 | chr9:6077452-6077603         | + | 300 | 152 | 165 | 326 |
| 139 | chr1:47217959-47218030       | - | 300 | 72  | 62  | 140 |
| 140 | chr3:53280470-53280541       | + | 300 | 72  | 247 | 318 |
| 141 | chr1:124675263-<br>124675371 | + | 300 | 109 | 232 | 335 |
| 142 | chr20:7135464-7135584        | + | 300 | 121 | 221 | 340 |
| 143 | chr1:12840701-12840839       | + | 300 | 139 | 164 | 308 |
| 144 | chr2:49707359-49707448       | - | 300 | 90  | 246 | 335 |
| 145 | chr1:137319622-<br>137319720 | - | 300 | 99  | 212 | 311 |
| 146 | chr4:52769490-52769531       | - | 300 | 42  | 190 | 231 |
| 147 | chr1:183474402-<br>183474521 | - | 295 | 120 | 194 | 316 |
| 148 | chr2:107246646-<br>107246883 | - | 295 | 238 | 45  | 283 |
| 149 | chr11:5130737-5130919        | + | 295 | 183 | 126 | 338 |
| 150 | chr7:27756417-27756515       | - | 295 | 99  | 221 | 327 |

|     |                          |   |     |     |     |     |
|-----|--------------------------|---|-----|-----|-----|-----|
| 151 | chr2:107059994-107060168 | + | 295 | 175 | 149 | 335 |
| 152 | chr4:70405362-70405441   | - | 295 | 80  | 261 | 338 |
| 153 | chr12:10027526-10027628  | + | 295 | 103 | 164 | 271 |
| 154 | chrZ:339884-339990       | + | 290 | 107 | 70  | 176 |
| 155 | chr5:38122752-38122858   | + | 290 | 107 | 236 | 340 |
| 156 | chr3:60463227-60463289   | + | 290 | 63  | 245 | 307 |
| 157 | chr2:143655961-143656113 | + | 290 | 153 | 58  | 215 |
| 158 | chr2:107207460-107207548 | - | 290 | 89  | 134 | 220 |
| 159 | chr3:1162733-1162791     | + | 290 | 59  | 163 | 221 |
| 160 | chr3:68106875-68107068   | - | 290 | 194 | 127 | 337 |
| 161 | chr13:1896882-1896932    | - | 290 | 51  | 249 | 300 |
| 162 | chr3:23354179-23354353   | - | 290 | 175 | 154 | 328 |
| 163 | chr6:11855873-11855945   | - | 290 | 73  | 249 | 322 |
| 164 | chr10:4987567-4987645    | - | 290 | 79  | 238 | 316 |
| 165 | chr6:16489700-16489785   | + | 290 | 86  | 206 | 294 |
| 166 | chr24:2222133-2222205    | - | 290 | 73  | 246 | 318 |
| 167 | chr12:9736790-9736864    | - | 290 | 75  | 249 | 323 |
| 168 | chr5:25295520-25295595   | + | 290 | 76  | 235 | 309 |
| 169 | chr3:27462744-27462917   | + | 285 | 174 | 164 | 340 |
| 170 | chr4:27916460-27916608   | + | 285 | 149 | 190 | 340 |
| 171 | chr1:81139936-81140001   | + | 285 | 66  | 204 | 278 |
| 172 | chr5:17303921-17304091   | - | 285 | 171 | 161 | 335 |
| 173 | chr6:17387443-17387526   | - | 285 | 84  | 198 | 283 |
| 174 | chr3:97966485-97966581   | - | 285 | 97  | 201 | 303 |
| 175 | chr5:32713640-32713736   | - | 280 | 97  | 204 | 295 |
| 176 | chr18:8236248-8236342    | - | 280 | 95  | 11  | 105 |
| 177 | chr3:15245355-15245452   | - | 280 | 98  | 231 | 330 |
| 178 | chr1:162702983-162703066 | + | 280 | 84  | 233 | 317 |
| 179 | chr10:10462693-10462840  | + | 280 | 148 | 164 | 328 |
| 180 | chr4:74237414-74237482   | - | 280 | 69  | 163 | 226 |
| 181 | chr14:16289094-16289157  | + | 280 | 64  | 240 | 304 |

|     |                          |   |     |     |     |     |
|-----|--------------------------|---|-----|-----|-----|-----|
| 182 | chr3:106511023-106511098 | + | 280 | 76  | 249 | 324 |
| 183 | chr1:101454727-101454818 | - | 280 | 92  | 244 | 336 |
| 184 | chr3:63393754-63393850   | - | 280 | 97  | 228 | 319 |
| 185 | chr1:155264982-155265037 | + | 280 | 56  | 243 | 299 |
| 186 | chr8:24852377-24852450   | + | 275 | 74  | 249 | 334 |
| 187 | chr1:50834452-50834546   | + | 275 | 95  | 162 | 258 |
| 188 | chr7:23696440-23696572   | - | 275 | 133 | 192 | 331 |
| 189 | chr3:15645872-15646107   | - | 275 | 236 | 51  | 294 |
| 190 | chr13:9807399-9807593    | + | 275 | 195 | 26  | 227 |
| 191 | chr5:39516801-39516868   | + | 275 | 68  | 271 | 336 |
| 192 | chr8:26397454-26397544   | - | 275 | 91  | 243 | 330 |
| 193 | chr18:8025114-8025231    | - | 275 | 118 | 191 | 322 |
| 194 | chr3:49898360-49898458   | - | 275 | 99  | 210 | 312 |
| 195 | chr8:15787095-15787230   | + | 275 | 136 | 181 | 330 |
| 196 | chrW:2028976-2029084     | - | 270 | 109 | 217 | 335 |
| 197 | chr1:45997196-45997230   | - | 270 | 35  | 258 | 292 |
| 198 | chr5:16847794-16847915   | - | 270 | 122 | 201 | 324 |
| 199 | chr12:8115757-8116010    | - | 270 | 254 | 64  | 307 |
| 200 | chr6:12266069-12266162   | - | 270 | 94  | 220 | 316 |
| 201 | chr11:17677702-17677758  | - | 270 | 57  | 230 | 286 |
| 202 | chr11:9670495-9670657    | - | 270 | 163 | 104 | 267 |
| 203 | chr3:99286722-99286797   | + | 270 | 76  | 243 | 317 |
| 204 | chr2:134345321-134345453 | - | 270 | 133 | 80  | 215 |
| 205 | chr2:58876155-58876213   | - | 270 | 59  | 277 | 336 |
| 206 | chr2:2719199-2719293     | - | 270 | 95  | 234 | 328 |
| 207 | chr4:5546820-5546893     | + | 270 | 74  | 247 | 320 |
| 208 | chr2:31652494-31652612   | + | 265 | 119 | 226 | 340 |
| 209 | chr3:102047783-102047878 | - | 265 | 96  | 65  | 161 |
| 210 | chr1:99961709-99961881   | + | 265 | 173 | 52  | 234 |
| 211 | chr2:83608393-83608496   | - | 265 | 104 | 110 | 214 |
| 212 | chr1:23300312-23300399   | + | 265 | 88  | 205 | 294 |

|     |                              |   |     |     |     |     |
|-----|------------------------------|---|-----|-----|-----|-----|
| 213 | chr3:79748581-79748722       | - | 265 | 142 | 172 | 316 |
| 214 | chr1:6195290-6195345         | + | 260 | 56  | 262 | 317 |
| 215 | chr3:104087784-<br>104087883 | + | 260 | 100 | 233 | 340 |
| 216 | chr3:55462144-55462331       | - | 260 | 188 | 69  | 290 |
| 217 | chr9:6429610-6429661         | - | 260 | 52  | 56  | 107 |
| 218 | chr11:16981280-16981401      | - | 260 | 122 | 58  | 196 |
| 219 | chr7:4423260-4423323         | + | 260 | 64  | 52  | 115 |
| 220 | chr10:8093188-8093245        | - | 260 | 58  | 50  | 107 |
| 221 | chr2:4243478-4243560         | + | 260 | 83  | 153 | 234 |
| 222 | chr14:4808817-4808915        | - | 260 | 99  | 235 | 333 |
| 223 | chr21:3406650-3406718        | - | 260 | 69  | 265 | 340 |
| 224 | chr12:15917832-15917895      | - | 260 | 64  | 228 | 291 |
| 225 | chr10:13632011-13632184      | - | 260 | 174 | 57  | 241 |
| 226 | chr3:9402438-9402507         | - | 260 | 70  | 259 | 328 |
| 227 | chr4:12870047-12870113       | + | 260 | 67  | 79  | 145 |
| 228 | chr1:127473783-<br>127473846 | - | 260 | 64  | 229 | 292 |
| 229 | chr1:100616178-<br>100616251 | + | 260 | 74  | 248 | 322 |
| 230 | chr11:4583512-4583561        | + | 260 | 50  | 163 | 213 |
| 231 | chr7:21018024-21018084       | + | 260 | 61  | 249 | 308 |
| 232 | chr18:2297475-2297595        | - | 260 | 121 | 201 | 319 |
| 233 | chr1:6171204-6171259         | + | 260 | 56  | 262 | 317 |
