# Supplementary material
Source: PubMed Central journal article supplement (PMC1544226)
Supplement: pnas_0604768103_18.pdf [file pnas_0604768103_18.pdf]

**Table 4 List of 96 AMCNE families in the human genome**

| Name                 | Coordinate of query CNE*  | Number of instances                            |                                                    | Conservation rate <sup>§</sup> |
|----------------------|---------------------------|------------------------------------------------|----------------------------------------------------|--------------------------------|
|                      |                           | Total number of instances ( $N$ ) <sup>†</sup> | overlapping conserved regions ( $K$ ) <sup>‡</sup> |                                |
| AMCNE1 <sup>¶</sup>  | chr10:100236524-100236862 | 916                                            | 680                                                | 0.75                           |
| AMCNE2               | chr16:72381161-72381464   | 186                                            | 168                                                | 0.90                           |
| AMCNE3               | chr7:21064922-21065153    | 69                                             | 65                                                 | 0.94                           |
| AMCNE4               | chr5:76487615-76487781    | 62                                             | 48                                                 | 0.77                           |
| AMCNE5 <sup>¶</sup>  | chr2:164247319-164247658  | 62                                             | 51                                                 | 0.82                           |
| AMCNE6               | chr13:52783581-52784381   | 60                                             | 45                                                 | 0.75                           |
| AMCNE7               | chr6:14659010-14659232    | 53                                             | 42                                                 | 0.79                           |
| AMCNE8               | chr8:97188349-97188633    | 53                                             | 48                                                 | 0.91                           |
| AMCNE9               | chr1:212501402-212501826  | 51                                             | 43                                                 | 0.84                           |
| AMCNE10              | chr2:199802826-199803721  | 47                                             | 39                                                 | 0.83                           |
| AMCNE11              | chr1:97715915-97716088    | 43                                             | 36                                                 | 0.84                           |
| AMCNE12              | chr10:63321600-63322245   | 39                                             | 34                                                 | 0.87                           |
| AMCNE13              | chr4:85604851-85605178    | 38                                             | 32                                                 | 0.84                           |
| AMCNE14              | chr11:84288444-84288669   | 38                                             | 29                                                 | 0.76                           |
| AMCNE15              | chr6:100266756-100267326  | 37                                             | 30                                                 | 0.81                           |
| AMCNE16              | chr2:25464408-25464766    | 36                                             | 30                                                 | 0.83                           |
| AMCNE17              | chr18:60092048-60092143   | 36                                             | 28                                                 | 0.78                           |
| AMCNE18              | chr2:104988979-104989266  | 36                                             | 30                                                 | 0.83                           |
| AMCNE19              | chr15:35993646-35993857   | 33                                             | 30                                                 | 0.91                           |
| AMCNE20              | chr18:36246424-36246651   | 33                                             | 26                                                 | 0.79                           |
| AMCNE21              | chr1:44501692-44501864    | 33                                             | 28                                                 | 0.85                           |
| AMCNE22              | chr15:87718169-87718796   | 33                                             | 32                                                 | 0.97                           |
| AMCNE23              | chr12:123768205-123768386 | 28                                             | 21                                                 | 0.75                           |
| AMCNE24              | chr2:143784410-143784831  | 28                                             | 25                                                 | 0.89                           |
| AMCNE25              | chr21:31270694-31270896   | 28                                             | 21                                                 | 0.75                           |
| AMCNE26              | chr3:118420908-118421246  | 27                                             | 23                                                 | 0.85                           |
| AMCNE27              | chr20:51538059-51538401   | 26                                             | 25                                                 | 0.96                           |
| AMCNE28              | chr15:94178575-94179143   | 25                                             | 25                                                 | 1.00                           |
| AMCNE29              | chr7:147166656-147166876  | 24                                             | 18                                                 | 0.75                           |
| AMCNE30              | chr2:205974179-205975165  | 24                                             | 19                                                 | 0.79                           |
| AMCNE31              | chr2:58193825-58194315    | 24                                             | 19                                                 | 0.79                           |
| AMCNE32              | chr20:10987552-10988001   | 23                                             | 20                                                 | 0.87                           |
| AMCNE33              | chr2:144411831-144411949  | 23                                             | 22                                                 | 0.96                           |
| AMCNE34              | chr1:80854807-80855032    | 23                                             | 19                                                 | 0.83                           |
| AMCNE35              | chr11:11101235-11101476   | 22                                             | 19                                                 | 0.86                           |
| AMCNE36              | chr2:228414660-228414738  | 22                                             | 22                                                 | 1.00                           |
| AMCNE37              | chr6:111757856-111758480  | 22                                             | 20                                                 | 0.91                           |
| AMCNE38              | chr15:94632179-94632366   | 22                                             | 17                                                 | 0.77                           |
| AMCNE39              | chr8:77791707-77791810    | 22                                             | 18                                                 | 0.82                           |
| AMCNE40              | chr3:26170372-26170609    | 22                                             | 17                                                 | 0.77                           |
| AMCNE41              | chr10:107041375-107041522 | 21                                             | 18                                                 | 0.86                           |
| AMCNE42              | chr18:72367088-72367249   | 21                                             | 17                                                 | 0.81                           |
| AMCNE43              | chr17:27666460-27666592   | 20                                             | 15                                                 | 0.75                           |
| AMCNE44              | chr3:128135794-128136026  | 20                                             | 16                                                 | 0.80                           |
| AMCNE45              | chr1:18567988-18568124    | 20                                             | 17                                                 | 0.85                           |
| AMCNE46              | chr2:80466472-80466620    | 20                                             | 15                                                 | 0.75                           |
| AMCNE47 <sup>¶</sup> | chr2:175782706-175782894  | 20                                             | 17                                                 | 0.85                           |
| AMCNE48              | chr14:100561083-100561281 | 20                                             | 15                                                 | 0.75                           |
| AMCNE49              | chr13:94624538-94624784   | 19                                             | 16                                                 | 0.84                           |
| AMCNE50              | chr15:34109184-34109696   | 19                                             | 18                                                 | 0.95                           |
| AMCNE51              | chr3:115772333-115772834  | 19                                             | 17                                                 | 0.90                           |
| AMCNE52              | chr12:109889269-109889334 | 19                                             | 15                                                 | 0.79                           |
| AMCNE53              | chr11:66907003-66907290   | 18                                             | 15                                                 | 0.83                           |
| AMCNE54              | chr2:171360981-171361312  | 18                                             | 14                                                 | 0.78                           |
| AMCNE55              | chr15:65693159-65693426   | 18                                             | 17                                                 | 0.94                           |
| AMCNE56              | chr4:183278710-183279108  | 18                                             | 16                                                 | 0.89                           |
| AMCNE57              | chr1:14443682-14443783    | 17                                             | 14                                                 | 0.82                           |

|         |                           |    |    |      |
|---------|---------------------------|----|----|------|
| AMCNE58 | chr2:161267282-161267507  | 17 | 13 | 0.77 |
| AMCNE59 | chr7:20932703-20932797    | 17 | 13 | 0.77 |
| AMCNE60 | chr14:97956212-97956528   | 17 | 13 | 0.77 |
| AMCNE61 | chr10:129310180-129310442 | 16 | 12 | 0.75 |
| AMCNE62 | chr8:78684483-78684721    | 16 | 16 | 1.00 |
| AMCNE63 | chr2:20885242-20885523    | 16 | 14 | 0.88 |
| AMCNE64 | chr2:60025697-60026207    | 16 | 16 | 1.00 |
| AMCNE65 | chr21:15189434-15189649   | 16 | 15 | 0.94 |
| AMCNE66 | chr6:26265274-26265323    | 16 | 16 | 1.00 |
| AMCNE67 | chr5:3176951-3177115      | 16 | 13 | 0.81 |
| AMCNE68 | chr18:20536102-20536371   | 16 | 12 | 0.75 |
| AMCNE69 | chr1:160273176-160273306  | 15 | 12 | 0.80 |
| AMCNE70 | chrX:24446553-24446863    | 15 | 12 | 0.80 |
| AMCNE71 | chr6:156923659-156923880  | 15 | 13 | 0.87 |
| AMCNE72 | chr14:53859158-53859448   | 15 | 15 | 1.00 |
| AMCNE73 | chr8:37341749-37342096    | 15 | 14 | 0.93 |
| AMCNE74 | chr3:125696009-125696196  | 15 | 13 | 0.87 |
| AMCNE75 | chr12:84303770-84304005   | 15 | 13 | 0.87 |
| AMCNE76 | chr4:31466716-31467019    | 15 | 13 | 0.87 |
| AMCNE77 | chr16:72270148-72270285   | 15 | 13 | 0.87 |
| AMCNE78 | chr3:118602727-118602794  | 14 | 11 | 0.79 |
| AMCNE79 | chr4:19752459-19752516    | 14 | 11 | 0.79 |
| AMCNE80 | chr15:41968678-41969218   | 14 | 13 | 0.93 |
| AMCNE81 | chr2:200296207-200296423  | 14 | 12 | 0.86 |
| AMCNE82 | chr18:50759633-50759793   | 14 | 13 | 0.93 |
| AMCNE83 | chr10:129964078-129964465 | 14 | 13 | 0.93 |
| AMCNE84 | chr18:36211686-36212204   | 14 | 12 | 0.86 |
| AMCNE85 | chr7:102782059-102782374  | 14 | 13 | 0.93 |
| AMCNE86 | chr3:174312051-174312437  | 13 | 10 | 0.77 |
| AMCNE87 | chr1:173947563-173947731  | 13 | 11 | 0.85 |
| AMCNE88 | chr12:23415874-23416318   | 13 | 12 | 0.92 |
| AMCNE89 | chr14:24786220-24786613   | 13 | 11 | 0.85 |
| AMCNE90 | chr12:40682695-40682843   | 12 | 10 | 0.83 |
| AMCNE91 | chr17:17591024-17591395   | 12 | 11 | 0.92 |
| AMCNE92 | chr11:30543193-30543639   | 12 | 11 | 0.92 |
| AMCNE93 | chr2:143820075-143820688  | 12 | 12 | 1.00 |
| AMCNE94 | chr2:156754095-156754440  | 11 | 11 | 1.00 |
| AMCNE95 | chr6:141179488-141179867  | 11 | 11 | 1.00 |
| AMCNE96 | chr13:71522478-71522619   | 11 | 11 | 1.00 |

\* The coordinate of query CNE is based on the human genome NCBI Build 35 (hg17).

† N, the number of sequences that are aligned to query CNE in the whole human genome, based on the human vs. human whole genome alignment generated by UCSC self-chain.

‡ K, the number of the aligned sequences overlapping conserved regions annotated by UCSC phastCons program

§ Conservation rate  $K/N$ .

¶ AMCNE1, AMCNE5, and AMCNE47 are referred to in the text as MER121, HsSINE3, and LF-SINE, respectively.

Note that these families contain smaller number of instances than the number reported in the text. This is due to the more stringent threshold used by the UCSC self-chain when compared to methods used in the text.

Further information on the 96 AMCNEs can be found online at [www.broad.mit.edu/seq/pubs/xie\\_pnas2006](http://www.broad.mit.edu/seq/pubs/xie_pnas2006).
