# Supplementary material
Source: PubMed Central journal article supplement (PMC1544226)
Supplement: pnas_0604768103_20.pdf [file pnas_0604768103_20.pdf]

**Table 2. Members of HsSINE3 family**

| Rank | Location                 | Strand | SW score | Size | Consensus start | Consensus end | Rate of perfect 4-way identity |
|------|--------------------------|--------|----------|------|-----------------|---------------|--------------------------------|
| 1    | chr2:164247319-164247658 | +      | 3400     | 340  | 1               | 340           | 95.58%                         |
| 2    | chr2:103864076-103864229 | -      | 685      | 154  | 163             | 317           | 96.75%                         |
| 3    | chr2:144311557-144311716 | -      | 595      | 160  | 173             | 335           | 87.50%                         |
| 4    | chr12:64746398-64746673  | +      | 555      | 276  | 60              | 338           | 72.34%                         |
| 5    | chr12:24237387-24237632  | -      | 520      | 246  | 61              | 312           | 56.84%                         |
| 6    | chr4:13193299-13193441   | -      | 510      | 143  | 171             | 316           | 88.11%                         |
| 7    | chr12:23715654-23715804  | -      | 500      | 151  | 179             | 335           | 58.11%                         |
| 8    | chrX:109369872-109370017 | -      | 490      | 146  | 146             | 292           | 84.72%                         |
| 9    | chr3:111484571-111484788 | -      | 475      | 218  | 113             | 325           | 49.73%                         |
| 10   | chr5:108738462-108738612 | +      | 455      | 151  | 164             | 318           | 62.96%                         |
| 11   | chr9:78883132-78883303   | +      | 455      | 172  | 163             | 340           | 63.92%                         |
| 12   | chr13:79671668-79671841  | +      | 450      | 174  | 165             | 334           | 66.07%                         |
| 13   | chr10:21399013-21399175  | -      | 440      | 163  | 165             | 328           | 82.72%                         |
| 14   | chr12:20405792-20405989  | +      | 440      | 198  | 45              | 250           | 76.26%                         |
| 15   | chr5:30708123-30708275   | -      | 430      | 153  | 178             | 330           | 92.16%                         |
| 16   | chr2:77008763-77008906   | -      | 430      | 144  | 164             | 312           | 56.03%                         |
| 17   | chr14:96271811-96271869  | +      | 410      | 59   | 244             | 302           | 79.25%                         |
| 18   | chr13:21556434-21556578  | +      | 395      | 145  | 190             | 335           | 58.41%                         |
| 19   | chr14:79103523-79103630  | +      | 380      | 108  | 191             | 291           | 87.96%                         |
| 20   | chr2:164052431-164052501 | +      | 380      | 71   | 231             | 301           | 76.06%                         |
| 21   | chr12:98207797-98207930  | -      | 375      | 134  | 194             | 331           | ***%                           |
| 22   | chr6:121283970-121284063 | +      | 375      | 94   | 245             | 340           | 66.28%                         |
| 23   | chr10:63192636-63192736  | +      | 370      | 101  | 234             | 335           | 50.00%                         |
| 24   | chr15:93091443-93091579  | +      | 370      | 137  | 196             | 338           | 60.31%                         |
| 25   | chr2:194021595-194021769 | +      | 370      | 175  | 163             | 335           | ***%                           |
| 26   | chr13:43171305-43171392  | -      | 365      | 88   | 47              | 135           | 58.23%                         |
| 27   | chr6:133838546-133838647 | -      | 360      | 102  | 160             | 260           | 51.11%                         |
| 28   | chr2:144395388-144395484 | +      | 360      | 97   | 189             | 288           | 89.69%                         |
| 29   | chr13:29878134-29878260  | -      | 360      | 127  | 188             | 317           | 75.41%                         |

|    |                               |   |     |     |     |     |        |
|----|-------------------------------|---|-----|-----|-----|-----|--------|
| 30 | chr20:9273426-9273531         | + | 360 | 106 | 235 | 340 | 63.00% |
| 31 | chr21:28842606-28842729       | - | 355 | 124 | 190 | 314 | 62.62% |
| 32 | chr8:59978428-59978587        | + | 355 | 160 | 173 | 335 | 64.83% |
| 33 | chrX:153857105-153857231      | + | 350 | 127 | 193 | 330 | 62.75% |
| 34 | chr2:144417754-144417840      | - | 350 | 87  | 244 | 330 | 93.02% |
| 35 | chr18:18692304-18692396       | - | 350 | 93  | 247 | 339 | 72.83% |
| 36 | chr13:70958466-70958545       | - | 340 | 80  | 243 | 322 | 76.25% |
| 37 | chr3:191703000-191703068      | + | 340 | 69  | 230 | 297 | 75.36% |
| 38 | chr8:67365054-67365149        | + | 340 | 96  | 226 | 324 | 61.29% |
| 39 | chr4:56667519-56667613        | + | 335 | 95  | 245 | 337 | 62.50% |
| 40 | chr5:50794520-50794618        | - | 330 | 99  | 231 | 329 | 55.56% |
| 41 | chr14:97162353-97162441       | - | 330 | 89  | 248 | 337 | 61.90% |
| 42 | chr11:132510948-<br>132511036 | - | 330 | 89  | 250 | 340 | 62.82% |
| 43 | chr3:118016384-118016469      | - | 330 | 86  | 244 | 330 | 74.42% |
| 44 | chr2:144716642-144716739      | + | 325 | 98  | 190 | 292 | 77.42% |
| 45 | chr10:63184419-63184527       | + | 325 | 109 | 233 | 340 | 73.15% |
| 46 | chr2:200542286-200542371      | + | 320 | 86  | 233 | 318 | 91.86% |
| 47 | chr10:109056821-<br>109056987 | + | 320 | 167 | 140 | 326 | 78.44% |
| 48 | chr5:37759498-37759710        | + | 320 | 213 | 123 | 335 | 68.87% |
| 49 | chr6:81993547-81993648        | + | 320 | 102 | 235 | 334 | 79.59% |
| 50 | chr10:29097282-29097365       | + | 320 | 84  | 241 | 324 | 70.21% |
| 51 | chr3:29283947-29284081        | - | 315 | 135 | 164 | 297 | 69.47% |
| 52 | chr7:110751670-110751754      | + | 315 | 85  | 255 | 336 | 91.76% |
| 53 | chr18:51916026-51916200       | + | 315 | 175 | 164 | 340 | 93.14% |
| 54 | chr2:21726701-21726771        | - | 310 | 71  | 258 | 328 | 90.14% |
| 55 | chr4:29471605-29471713        | + | 310 | 109 | 230 | 337 | 58.82% |
| 56 | chr10:9010519-9010589         | + | 310 | 71  | 249 | 319 | 88.73% |
| 57 | chr10:63325965-63326107       | - | 310 | 143 | 165 | 302 | 59.02% |
| 58 | chr8:64621935-64622107        | + | 300 | 173 | 129 | 295 | 48.80% |
| 59 | chrX:38767596-38767705        | - | 300 | 110 | 194 | 317 | 97.25% |
| 60 | chr10:103347120-<br>103347209 | - | 300 | 90  | 248 | 338 | 85.56% |
| 61 | chr3:166532834-166532945      | + | 300 | 112 | 224 | 334 | 79.28% |

|    |                           |   |     |     |     |     |         |
|----|---------------------------|---|-----|-----|-----|-----|---------|
| 62 | chr6:156380831-156381022  | - | 300 | 192 | 148 | 327 | 85.86%  |
| 63 | chr12:106197303-106197398 | + | 295 | 96  | 244 | 337 | 62.50%  |
| 64 | chr4:131379226-131379301  | + | 295 | 76  | 257 | 334 | 57.38%  |
| 65 | chr8:94209598-94209750    | - | 295 | 153 | 191 | 340 | 62.50%  |
| 66 | chr1:118588323-118588429  | + | 295 | 107 | 220 | 328 | 70.59%  |
| 67 | chr10:114532350-114532456 | + | 290 | 107 | 233 | 340 | 63.83%  |
| 68 | chr4:124161677-124161725  | + | 290 | 49  | 44  | 92  | 60.47%  |
| 69 | chr1:72858008-72858089    | + | 290 | 82  | 247 | 328 | 50.67%  |
| 70 | chr2:221981243-221981370  | + | 290 | 128 | 193 | 325 | 65.79%  |
| 71 | chr1:185353590-185353636  | + | 290 | 47  | 244 | 290 | 37.50%  |
| 72 | chr15:55064210-55064372   | - | 290 | 163 | 166 | 330 | 63.09%  |
| 73 | chr4:101079123-101079183  | - | 290 | 61  | 239 | 299 | 57.63%  |
| 74 | chr7:83949875-83949945    | + | 290 | 71  | 45  | 115 | 79.10%  |
| 75 | chr1:8817101-8817234      | + | 285 | 134 | 154 | 275 | 69.35%  |
| 76 | chr1:46312860-46312940    | + | 285 | 81  | 202 | 285 | 80.25%  |
| 77 | chr18:57062269-57062357   | + | 285 | 89  | 244 | 333 | 66.67%  |
| 78 | chr6:120912611-120912718  | - | 285 | 108 | 211 | 327 | 49.06%  |
| 79 | chr10:16580590-16580815   | - | 285 | 226 | 78  | 312 | 57.83%  |
| 80 | chr15:59355460-59355619   | + | 285 | 160 | 166 | 333 | 81.76%  |
| 81 | chr13:57096770-57096884   | - | 285 | 115 | 58  | 172 | 77.68%  |
| 82 | chr2:212507111-212507309  | + | 285 | 199 | 126 | 324 | 61.73%  |
| 83 | chr12:68234034-68234163   | + | 280 | 130 | 207 | 339 | ***%    |
| 84 | chr1:213896164-213896366  | + | 280 | 203 | 87  | 285 | 48.60%  |
| 85 | chr2:140392030-140392089  | + | 280 | 60  | 271 | 330 | 46.15%  |
| 86 | chr20:21753359-21753438   | + | 280 | 80  | 250 | 330 | 45.59%  |
| 87 | chr5:90643484-90643525    | + | 280 | 42  | 58  | 99  | 100.00% |
| 88 | chr3:33844107-33844202    | - | 280 | 96  | 65  | 160 | 58.95%  |
| 89 | chr1:81720017-81720134    | + | 275 | 118 | 193 | 312 | 41.51%  |
| 90 | chr12:30457971-30458033   | + | 275 | 63  | 276 | 339 | 49.15%  |
| 91 | chr9:29581399-29581505    | + | 275 | 107 | 224 | 333 | 55.66%  |
| 92 | chr3:169009783-169009870  | + | 275 | 88  | 249 | 339 | 76.19%  |
| 93 | chr3:182491557-182491651  | + | 275 | 95  | 190 | 288 | 91.58%  |
| 94 | chr11:30672367-30672428   | - | 270 | 62  | 194 | 260 | 91.94%  |

|     |                               |   |     |     |     |     |        |
|-----|-------------------------------|---|-----|-----|-----|-----|--------|
| 95  | chr14:60955182-60955341       | + | 270 | 160 | 182 | 340 | 64.58% |
| 96  | chr14:97430225-97430357       | + | 270 | 133 | 201 | 339 | 55.37% |
| 97  | chr14:100643445-<br>100643503 | + | 270 | 59  | 192 | 247 | ***%   |
| 98  | chr15:93429325-93429466       | - | 270 | 142 | 191 | 329 | 69.01% |
| 99  | chr17:55147993-55148071       | + | 270 | 79  | 230 | 310 | ***%   |
| 100 | chr18:43384587-43384639       | - | 270 | 53  | 246 | 299 | 81.13% |
| 101 | chr5:126698451-126698535      | - | 270 | 85  | 248 | 330 | 90.59% |
| 102 | chr9:13609442-13609530        | + | 270 | 89  | 248 | 336 | 82.76% |
| 103 | chr12:13933622-13933658       | - | 270 | 37  | 262 | 298 | 67.57% |
| 104 | chr7:25625428-25625612        | + | 270 | 185 | 156 | 336 | 69.78% |
| 105 | chr3:115939741-115939804      | - | 270 | 64  | 262 | 324 | 64.06% |
| 106 | chr3:70515376-70515470        | + | 265 | 95  | 240 | 334 | 92.63% |
| 107 | chr15:30824980-30825141       | - | 260 | 162 | 156 | 333 | 82.61% |
| 108 | chr10:107041460-<br>107041551 | - | 260 | 92  | 235 | 326 | 82.61% |
| 109 | chr15:59012180-59012235       | + | 260 | 56  | 57  | 112 | 76.79% |
| 110 | chr13:71992968-71993064       | + | 260 | 97  | 233 | 340 | 86.32% |
| 111 | chr4:114161384-114161445      | - | 260 | 62  | 235 | 297 | ***%   |
| 112 | chr8:141782061-141782096      | - | 260 | 36  | 277 | 312 | 51.61% |
| 113 | chr14:45173005-45173058       | + | 260 | 54  | 60  | 113 | 69.81% |
| 114 | chr4:112235966-112236019      | - | 260 | 54  | 274 | 327 | ***%   |
| 115 | chr18:22728686-22728775       | - | 260 | 90  | 245 | 335 | 68.54% |
| 116 | chr2:181397884-181397951      | + | 260 | 68  | 247 | 315 | 73.85% |
| 117 | chr8:73876790-73876888        | + | 260 | 99  | 219 | 316 | 82.83% |
| 118 | chr2:193018810-193018910      | - | 260 | 101 | 191 | 299 | 38.78% |
| 119 | chr6:164051082-164051163      | + | 260 | 82  | 257 | 335 | 53.33% |
| 120 | chr10:53852978-53853062       | + | 260 | 85  | 252 | 339 | ***%   |
| 121 | chr4:81494650-81494736        | + | 260 | 87  | 244 | 330 | 73.56% |
| 122 | chr3:147879145-147879236      | + | 260 | 92  | 242 | 335 | ***%   |
| 123 | chr7:131921695-131921742      | - | 260 | 48  | 134 | 181 | 52.50% |
| 124 | chr3:115564795-115564836      | - | 260 | 42  | 185 | 226 | 77.50% |
