# Supplementary material
Source: PubMed Central journal article supplement (PMC1544226)

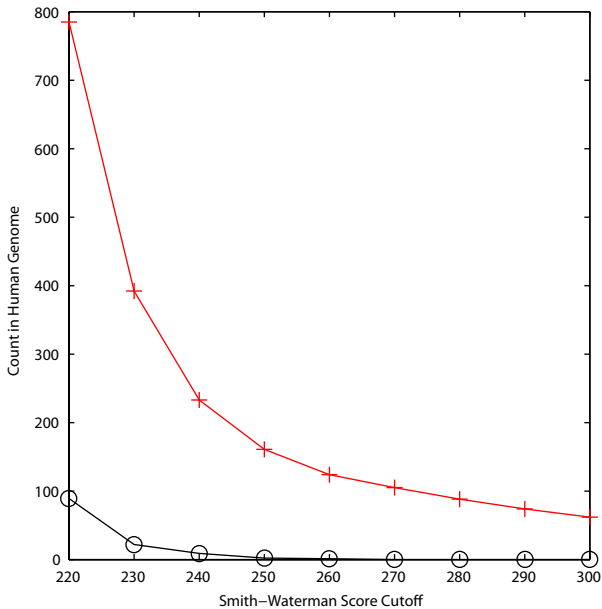

Supplement: pnas_0604768103_1.pdf [file pnas_0604768103_1.pdf]

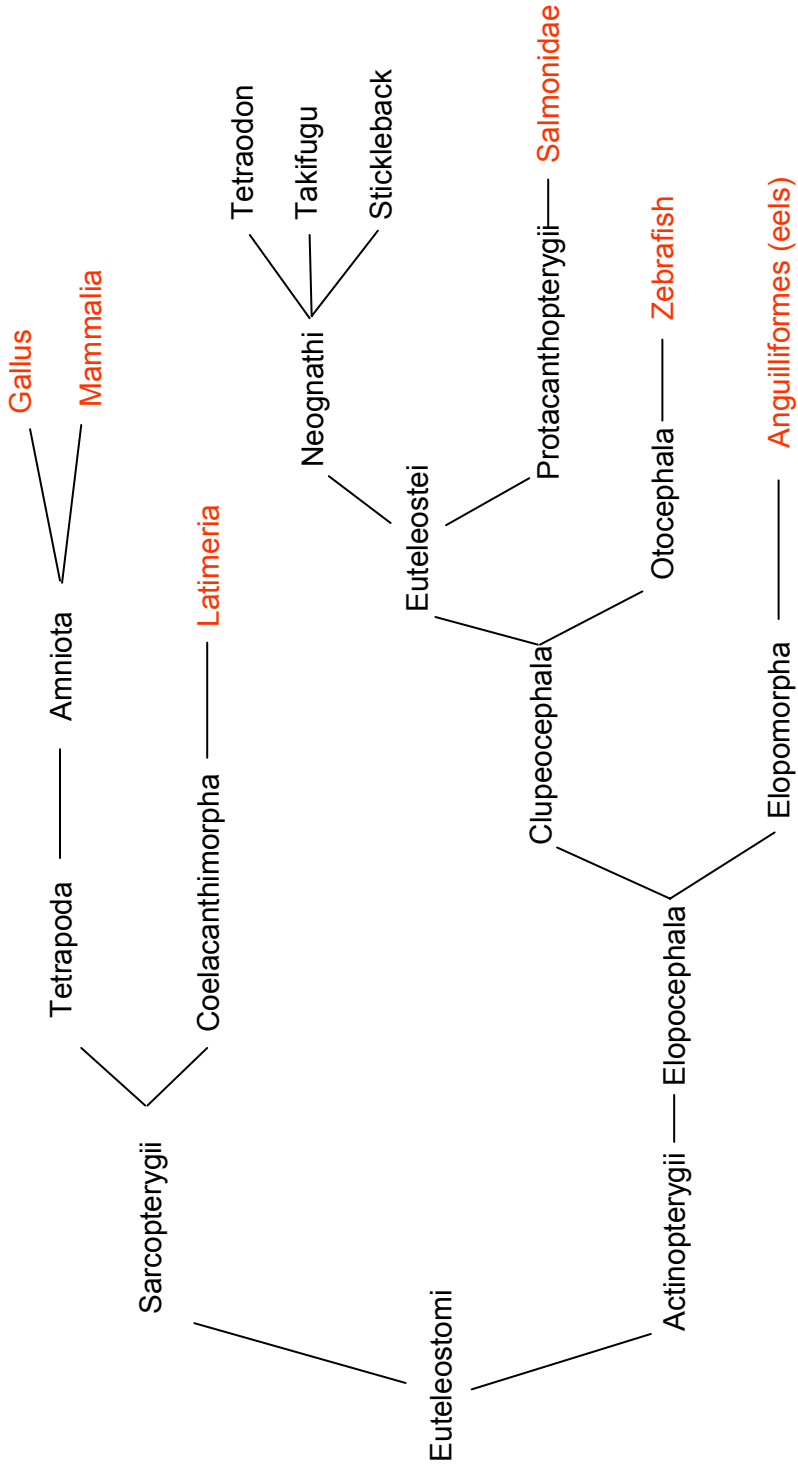

Supplement: pnas_0604768103_10.pdf [file pnas_0604768103_10.pdf]

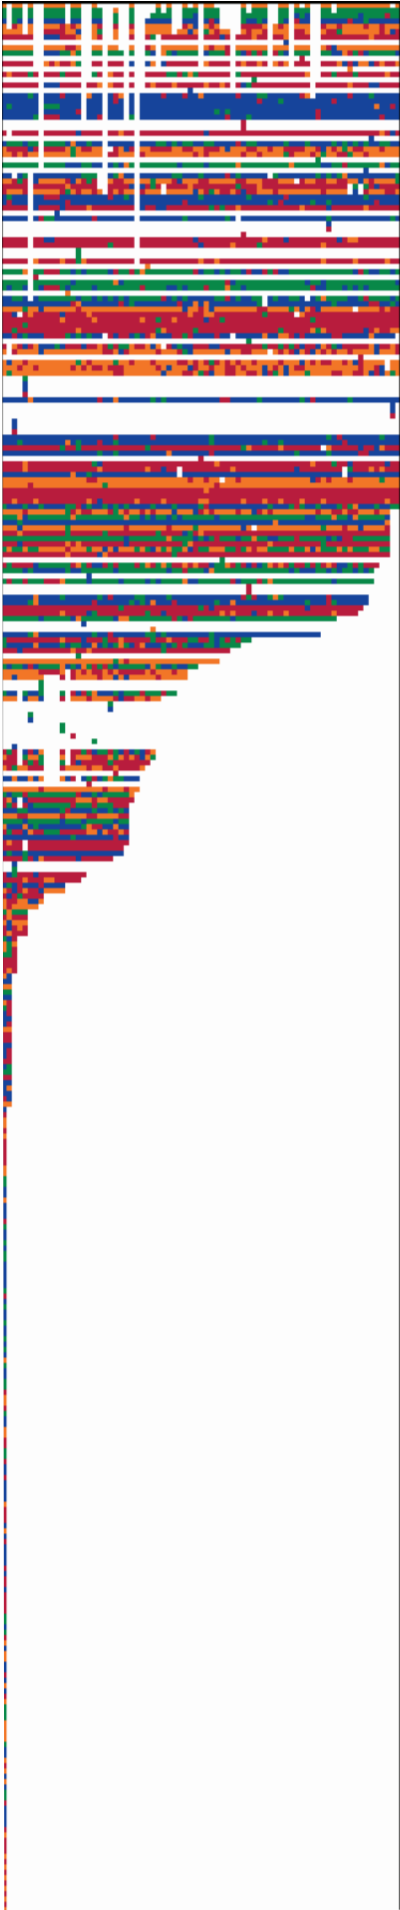

(A)

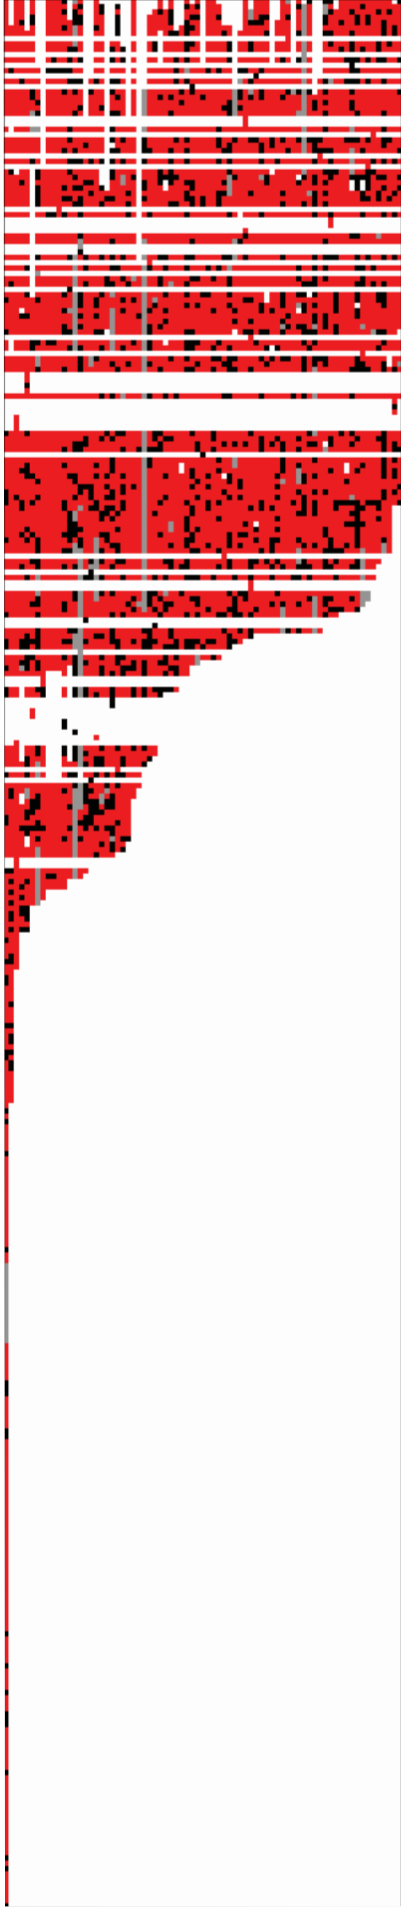

(B)

Supplement: pnas_0604768103_13.pdf [file pnas_0604768103_13.pdf]

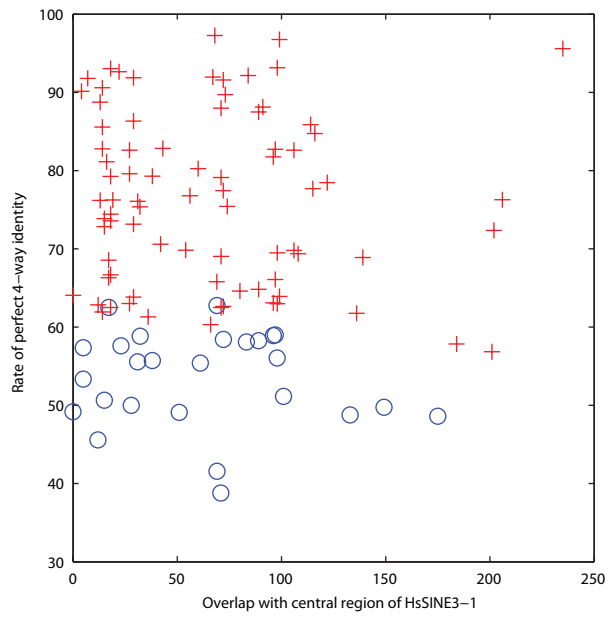

Supplement: pnas_0604768103_14.pdf [file pnas_0604768103_14.pdf]

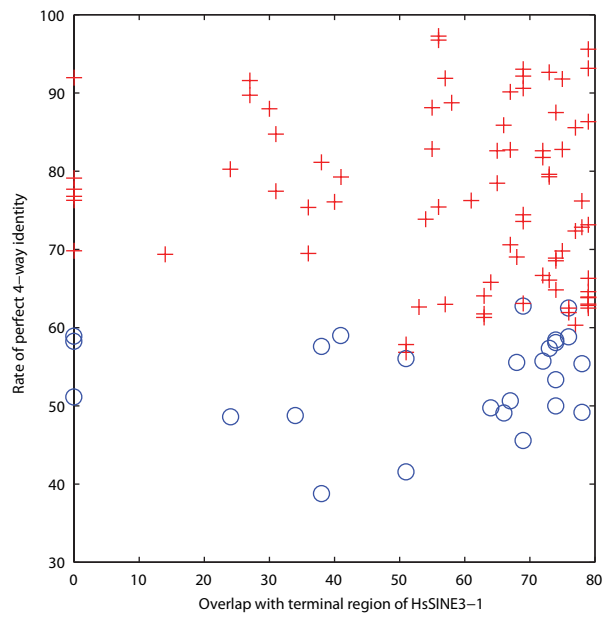

Supplement: pnas_0604768103_15.pdf [file pnas_0604768103_15.pdf]

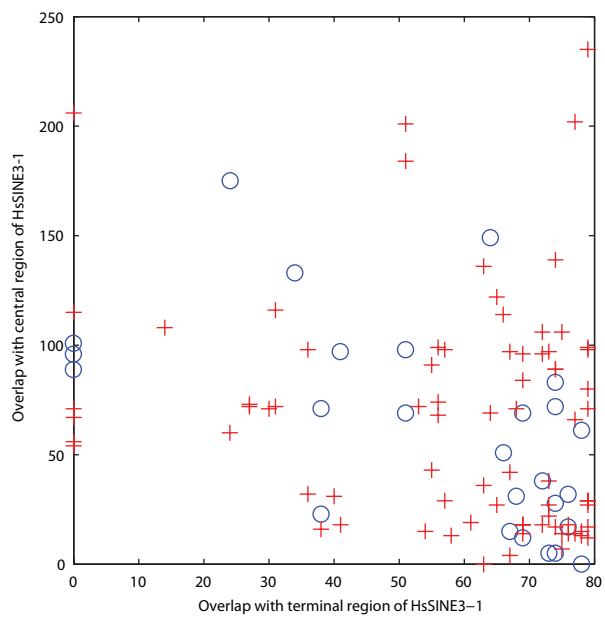

Supplement: pnas_0604768103_16.pdf [file pnas_0604768103_16.pdf]

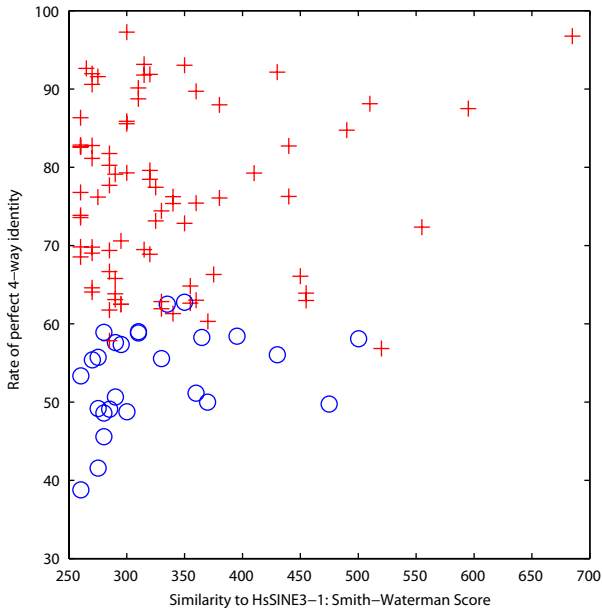

Supplement: pnas_0604768103_3.pdf [file pnas_0604768103_3.pdf]

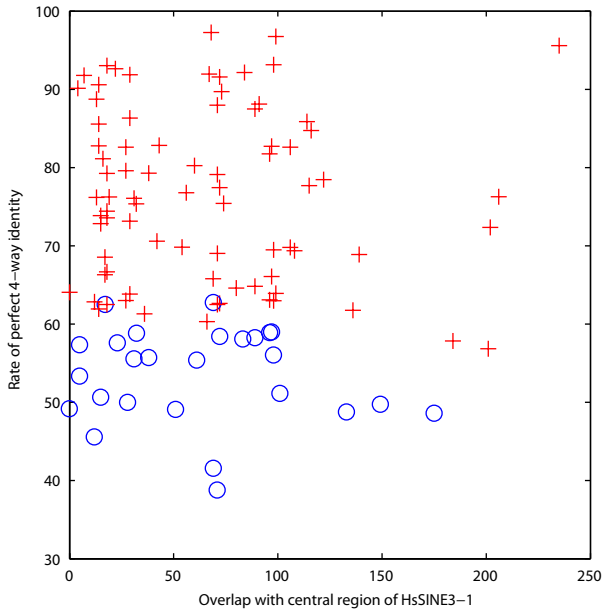

Supplement: pnas_0604768103_4.pdf [file pnas_0604768103_4.pdf]

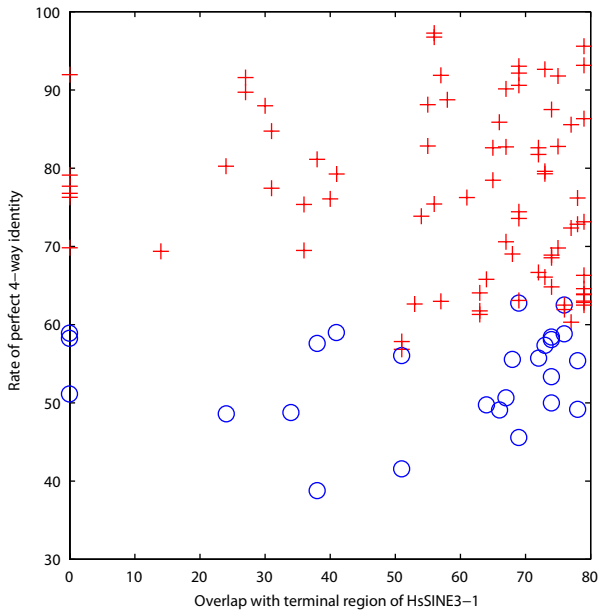

Supplement: pnas_0604768103_5.pdf [file pnas_0604768103_5.pdf]

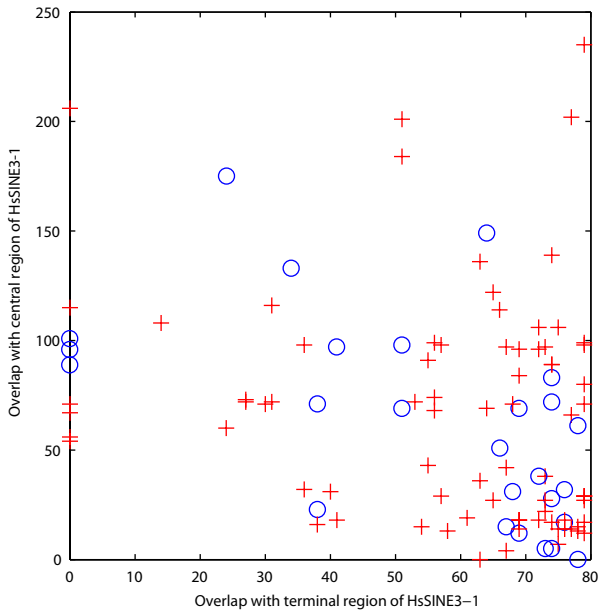

**Supporting Figure 6**

Supplement: pnas_0604768103_6.pdf [file pnas_0604768103_6.pdf]
